# Supplementary material for: Investigating the An+1BnX3n+1 Homologous Series: A New Platform for Studying Magnetic Praseodymium Based Intermetallics
Source: PubMed Central journal article supplement — ACS Omega. 2022 Jun 3;7(23):19048–57. doi: 10.1021/acsomega.2c02152 (PMC9202054; doi:10.1021/acsomega.2c02152), 2022-06-03
Supplement: ao2c02152_si_001.pdf [file ao2c02152_si_001.pdf]

## Supporting Information:

### Investigating the $A_{n+1}B_nX_{3n+1}$ Homologous Series: A New Platform for Studying Magnetic Praseodymium Based Intermetallics

Trent M. Kyrk,<sup>1</sup> Moises Bravo,<sup>1</sup> Gregory T. McCandless,<sup>1</sup> Saul H. Lapidus,<sup>2</sup> and Julia Y Chan<sup>1\*</sup>

<sup>1</sup> Department of Chemistry & Biochemistry, Baylor University, Waco, Texas 76798, United States

<sup>2</sup> X-ray Science Division, Advanced Photon Source, Argonne National Laboratory, Argonne, Illinois 60439, United States

#### Disorder Model for $Pr_4Co_{3+x}Ge_{10-y}Sn_y$ and $Pr_5Co_{4+x}Ge_{13-y}Sn_y$

The disorder of the Pr2 local environment in  $Pr_4Co_{3+x}Ge_{10-y}Sn_y$  and Pr1/Pr3 environment in  $Pr_5Co_{4+x}Ge_{13-y}Sn_y$  were modelled as a mixture of Sn and Co-Ge dimers with Co vacancies. The total occupancy of all configurations was constrained to unity, since without this constraint total occupancy remained approximately 98%. Additionally, without either the Co-Ge dimer or Sn atom a void of approximately  $10 \times 4 \times 4 \text{ \AA}^3$  would remain, which without distortions occurring elsewhere in the structure is chemically unreasonable in an intermetallic system. Additionally, the atomic displacement parameters of Co, Ge, and Sn were set equal to prevent unrealistic features, such as overlapping atomic positions. Mixing of Ge and Sn was considered on the Sn sites of both structures but did not result in significant improvement in the refinement quality.

Table S1. Crystallographic Data, Data Collection, and Refinement Parameters

| Empirical formula                          | $Pr_4Co_{3.25(3)}Ge_{9.50(1)}Sn_{0.469(4)}$ | $Pr_5Co_{4.22(2)}Ge_{12.48(1)}Sn_{0.519(7)}$ |
|--------------------------------------------|---------------------------------------------|----------------------------------------------|
| Space group                                | <i>Cmcm</i> (no. 63)                        | <i>Cmmm</i> (no. 65)                         |
| Lattice parameters                         |                                             |                                              |
| <i>a</i> (Å)                               | 4.3091(12)                                  | 4.2899(9)                                    |
| <i>b</i> (Å)                               | 35.750(9)                                   | 45.487(8)                                    |
| <i>c</i> (Å)                               | 4.2807(11)                                  | 4.3115(7)                                    |
| Volume [Å <sup>3</sup> ]                   | 659.4(3)                                    | 841.3(3)                                     |
| Z                                          | 2                                           | 2                                            |
| Density [g/cm <sup>3</sup> ]               | 7.575                                       | 7.583                                        |
| Absorption coefficient [mm <sup>-1</sup> ] | 40.59                                       | 40.82                                        |
| <i>R</i> (000)                             | 1306                                        | 1669                                         |

|                                                    |                    |                    |
|----------------------------------------------------|--------------------|--------------------|
| Crystal size [mm <sup>3</sup> ]                    | 0.01 x 0.01 x 0.02 | 0.02 x 0.12 x 0.14 |
| $\theta$ range [°]                                 | 2.3 – 30.4         | 2.7 – 30.5         |
| Index range                                        |                    |                    |
| $h$                                                | -6 → 6             | -6 → 6             |
| $k$                                                | -50 → 50           | -64 → 64           |
| $l$                                                | -6 → 6             | -6 → 6             |
| Number of reflections                              | 10797              | 16553              |
| Unique reflections                                 | 630                | 817                |
| parameters/restraints                              | 42/2               | 55/2               |
| $R_{\text{int}}$                                   | 0.052              | 0.072              |
| $\Delta\rho_{\text{max/min}}$ (e-/Å <sup>3</sup> ) | 1.81/-2.41         | 3.21/-3.40         |
| GoF                                                | 1.13               | 1.16               |
| $R [F^2 > 2\sigma(F^2)]$                           | 0.033              | 0.033              |
| $wR_2 (F^2)$                                       | 0.068              | 0.094              |

---


$$R = \frac{\sum ||F_o| - |F_c||}{\sum |F_o|} \text{ and } wR_2 = \left\{ \frac{\sum w[(F_o)^2 - (F_c)^2]^2}{\sum w[(F_o)^2]^2} \right\}^{1/2}$$


---

Table S2. Atomic Coordinates and Displacement Parameters for  $\text{Pr}_4\text{Co}_{3+x}\text{Ge}_{10-y}\text{Sn}_y$  Compared to  $\text{Eu}_4\text{Ni}_{4-x}\text{Sn}_{10}$

| Site Label                                                                                | Wyckoff    | $x$ | $y$         | $z$ | $U_{\text{eq}} (\text{\AA}^2)$ | Occupancy |
|-------------------------------------------------------------------------------------------|------------|-----|-------------|-----|--------------------------------|-----------|
| <b><math>\text{Eu}_4\text{Ni}_{2.98(2)}\text{Sn}_{10}^1</math></b>                        |            |     |             |     |                                |           |
| Eu1                                                                                       | 4 <i>c</i> | 0   | 0.81769(1)  | 1/4 | 0.0123(1)                      | 1         |
| Eu2                                                                                       | 4 <i>c</i> | 0   | 0.54802(1)  | 1/4 | 0.0129(1)                      | 1         |
| Ni2                                                                                       | 4 <i>c</i> | 0   | 0.91216(3)  | 1/4 | 0.0111(3)                      | 1         |
| Sn1                                                                                       | 4 <i>c</i> | 0   | 0.97762(2)  | 1/4 | 0.0138(2)                      | 1         |
| Sn2                                                                                       | 4 <i>c</i> | 0   | 0.25017(3)  | 1/4 | 0.0258(2)                      | 1         |
| Sn3                                                                                       | 4 <i>c</i> | 0   | 0.38403(2)  | 1/4 | 0.0137(2)                      | 1         |
| Sn4                                                                                       | 4 <i>c</i> | 0   | 0.115188(2) | 1/4 | 0.0135(2)                      | 1         |
| Ni1                                                                                       | 4 <i>c</i> | 0   | 0.72828(7)  | 1/4 | 0.0185(15)                     | 0.482(7)  |
| Sn5A                                                                                      | 4 <i>c</i> | 0   | 0.66797(5)  | 1/4 | 0.0143(2)                      | 0.528(2)  |
| Sn5B                                                                                      | 4 <i>c</i> | 0   | 0.68132(5)  | 1/4 | 0.0143(2)                      | 0.472(2)  |
| <b><math>\text{Pr}_4\text{Co}_{3.25(3)}\text{Ge}_{9.50(1)}\text{Sn}_{0.469(4)}</math></b> |            |     |             |     |                                |           |
| Pr1                                                                                       | 4 <i>c</i> | 0   | 0.81937(2)  | 1/4 | 0.01133(18)                    | 1         |
| Pr2                                                                                       | 4 <i>c</i> | 0   | 0.54728(2)  | 1/4 | 0.00817(17)                    | 1         |
| Co2                                                                                       | 4 <i>c</i> | 0   | 0.91305(5)  | 1/4 | 0.0076(3)                      | 1         |
| Ge1                                                                                       | 4 <i>c</i> | 0   | 0.97881(4)  | 1/4 | 0.0084(3)                      | 1         |
| Ge2                                                                                       | 4 <i>c</i> | 0   | 0.25012(4)  | 1/4 | 0.0124(3)                      | 1         |
| Ge3                                                                                       | 4 <i>c</i> | 0   | 0.38576(4)  | 1/4 | 0.0096(3)                      | 1         |
| Ge4                                                                                       | 4 <i>c</i> | 0   | 0.11415(4)  | 1/4 | 0.0095(3)                      | 1         |
| Co1A                                                                                      | 4 <i>c</i> | 0   | 0.72387(11) | 1/4 | 0.0139(4)                      | 0.577(7)  |
| Ge5A                                                                                      | 4 <i>c</i> | 0   | 0.66098(9)  | 1/4 | 0.0139(4)                      | 0.667(3)  |
| Co1B                                                                                      | 4 <i>c</i> | 0   | 0.6386(8)   | 1/4 | 0.0139(4)                      | 0.050(6)  |
| Ge5B                                                                                      | 4 <i>c</i> | 0   | 0.7010(6)   | 1/4 | 0.0139(4)                      | 0.084(3)  |
| Sn1                                                                                       | 4 <i>c</i> | 0   | 0.68013(16) | 1/4 | 0.0139(4)                      | 0.248(2)  |

Table S3. Atomic Coordinates and Displacement Parameters for  $\text{Pr}_5\text{Co}_{4+x}\text{Ge}_{13-y}\text{Sn}_y$  Compared to  $\text{Ce}_5\text{Co}_{4+x}\text{Ge}_{13-y}\text{Sn}_y$

| Site Label                                                                                 | Wyckoff | $x$ | $y$         | $z$ | $U_{\text{eq}} (\text{\AA}^2)$ | Occupancy  |
|--------------------------------------------------------------------------------------------|---------|-----|-------------|-----|--------------------------------|------------|
| <b><math>\text{Ce}_5\text{Co}_{4.44}\text{Ge}_{12.44}\text{Sn}_{0.56}^2</math></b>         |         |     |             |     |                                |            |
| Ce1                                                                                        | $4j$    | 0   | 0.39185(2)  | 1/2 | 0.00763(19)                    | 1          |
| Ce2                                                                                        | $4i$    | 0   | 0.21286(2)  | 0   | 0.00650(18)                    | 1          |
| Ce3                                                                                        | $2a$    | 0   | 0           | 0   | 0.0098(2)                      | 1          |
| Co1                                                                                        | $4j$    | 0   | 0.31873(3)  | 1/2 | 0.0055(3)                      | 1          |
| Ge1                                                                                        | $4j$    | 0   | 0.05303(3)  | 1/2 | 0.0098(2)                      | 1          |
| Ge2                                                                                        | $4j$    | 0   | 0.16017(2)  | 1/2 | 0.0074(2)                      | 1          |
| Ge3                                                                                        | $4j$    | 0   | 0.26676(2)  | 1/2 | 0.0061(2)                      | 1          |
| Ge5                                                                                        | $4i$    | 0   | 0.33979(2)  | 0   | 0.0071(2)                      | 1          |
| Ge6                                                                                        | $4i$    | 0   | 0.44698(3)  | 0   | 0.0100(3)                      | 1          |
| Co2                                                                                        | $4i$    | 0   | 0.07341(4)  | 0   | 0.0107(4)                      | 0.866(6)   |
| Ge4                                                                                        | $4i$    | 0   | 0.12335(5)  | 0   | 0.0099(3)                      | 0.866(6)   |
| Sn1                                                                                        | $4i$    | 0   | 0.1081(3)   | 0   | 0.020(2)                       | 0.134(6)   |
| Co3                                                                                        | $4j$    | 1/2 | 0.03342(10) | 1/2 | 0.0139(5)                      | 0.3560(16) |
| Ge7                                                                                        | $4j$    | 1/2 | -0.01576(8) | 1/2 | 0.0139(5)                      | 0.3560(16) |
| Sn2                                                                                        | $2c$    | 1/2 | 0           | 1/2 | 0.0139(5)                      | 0.288(3)   |
| <b><math>\text{Pr}_5\text{Co}_{4.22(2)}\text{Ge}_{12.48(1)}\text{Sn}_{0.519(7)}</math></b> |         |     |             |     |                                |            |
| Pr1                                                                                        | $4j$    | 0   | 0.39170(2)  | 1/2 | 0.00680(19)                    | 1          |
| Pr2                                                                                        | $4i$    | 0   | 0.21302(2)  | 0   | 0.00550(18)                    | 1          |
| Pr3                                                                                        | $2a$    | 0   | 0           | 0   | 0.0087(2)                      | 1          |
| Co1                                                                                        | $4j$    | 0   | 0.31849(3)  | 1/2 | 0.0047(3)                      | 1          |
| Ge1                                                                                        | $4j$    | 0   | 0.05311(3)  | 1/2 | 0.0094(3)                      | 1          |
| Ge2                                                                                        | $4j$    | 0   | 0.16042(2)  | 1/2 | 0.0064(2)                      | 1          |
| Ge3                                                                                        | $4j$    | 0   | 0.26668(2)  | 1/2 | 0.0055(2)                      | 1          |
| Ge5                                                                                        | $4i$    | 0   | 0.33959(2)  | 0   | 0.0060(2)                      | 1          |
| Ge6                                                                                        | $4i$    | 0   | 0.44685(2)  | 0   | 0.0096(3)                      | 1          |

|     |            |     |             |     |           |            |
|-----|------------|-----|-------------|-----|-----------|------------|
| Co2 | 4 <i>i</i> | 0   | 0.07342(4)  | 0   | 0.0090(3) | 0.829(5)   |
| Ge4 | 4 <i>i</i> | 0   | 0.12331(3)  | 0   | 0.0090(3) | 0.8756(17) |
| Sn1 | 4 <i>i</i> | 0   | 0.10813(13) | 0   | 0.0090(3) | 0.1244(17) |
| Co3 | 4 <i>j</i> | 1/2 | 0.03376(13) | 1/2 | 0.0132(5) | 0.282(5)   |
| Ge7 | 4 <i>j</i> | 1/2 | -0.01560(8) | 1/2 | 0.0132(5) | 0.3651(11) |
| Sn2 | 2 <i>c</i> | 1/2 | 0           | 1/2 | 0.0132(5) | 0.270(2)   |

## References

1. Harmening, T.; Eul, M.; Pöttgen, R., Nickel-deficient Stannides  $\text{Eu}_2\text{Ni}_{2-x}\text{Sn}_5$  – Structure, Magnetic Properties, and Mössbauer Spectroscopic Characterization. *Z. Naturforsch. B: Chem. Sci.* **2009**, *64*, 1107-1114.
2. Weiland, A.; Wei, K.; McCandless, G. T.; Baumbach, R. E.; Chan, J. Y., Fantastic  $n = 4$ :  $\text{Ce}_5\text{Co}_{4+x}\text{Ge}_{13-y}\text{Sn}_y$  of the  $\text{A}_{n+1}\text{M}_n\text{X}_{3n+1}$  Homologous Series. *J. Chem. Phys.* **2021**, *154*, 114707.
